# Supplementary material
Source: ML conference proceedings conference paper supplement (https://aclanthology.org/2020.emnlp-main.301)
Supplement: OptionalSupplementaryMaterial [file 2020.emnlp-main.301.OptionalSupplementaryMaterial.zip]

Archive with 1 entries (1 files):
- sincere_appendix.pdf
